# Supplementary material for: Thermosalient effect of a naphthalene diimide and tetrachlorocobaltate hybrid and changes of color and magnetic properties by ammonia vapor
Source: Royal Society of Chemistry journal article supplement (doi:10.1039/d3dt01822a), 2023-01-01
Supplement: d3dt01822a1.pdf [file d3dt01822a1.pdf]

## SUPPLEMENTARY INFORMATION

### **Thermosalient effect of naphthalene diimide and tetrachlorocobaltate hybrid and changes of color and magnetic property by ammonia vapor**

Shunya Masuda, Sotaro Kusumoto,\* Masaya Okamura, Shiro Hikichi, Ryuya Tokunaga, Shinya Hayami, Yang Kim, Yoshihiro Koide\*

<sup>a</sup> *Department of Material and Life Chemistry, Faculty of Engineering, Kanagawa University, 3-27-1 Rokkakubashi, Kanagawa-ku, Yokohama 221-8686, Japan.*

<sup>b</sup> *Department of Chemistry, Graduate School of Science and Technology, Kumamoto University, 2-39-1 Kurokami, Chuo-ku, Kumamoto 860-8555, Japan.*

Corresponding author: S. Kusumoto  
E-mail: [kusumoto@kanagawa-u.ac.jp](mailto:kusumoto@kanagawa-u.ac.jp)

## Supplementary data

Table S1. Crystallographic data of **1**.

| Compound                                            | <b>1</b>                                                                         |
|-----------------------------------------------------|----------------------------------------------------------------------------------|
| formula                                             | C <sub>24</sub> H <sub>16</sub> Cl <sub>4</sub> Co N <sub>4</sub> O <sub>5</sub> |
| formula weight                                      | 641.14                                                                           |
| crystal system                                      | triclinic                                                                        |
| space group                                         | <i>P</i> -1                                                                      |
| <i>a</i> / Å                                        | 9.6173(10)                                                                       |
| <i>b</i> / Å                                        | 9.7060(10)                                                                       |
| <i>c</i> / Å                                        | 14.232(2)                                                                        |
| $\alpha$ / °                                        | 106.092(10)                                                                      |
| $\beta$ / °                                         | 93.459(10)                                                                       |
| $\gamma$ / °                                        | 93.474(8)                                                                        |
| <i>V</i> / Å <sup>3</sup>                           | 1269.9(3)                                                                        |
| <i>Z</i>                                            | 2                                                                                |
| <i>T</i> / K                                        | 300                                                                              |
| <i>R</i> <sub>1</sub> [ <i>I</i> > 2σ( <i>I</i> )]  | 0.1016                                                                           |
| <i>wR</i> <sub>2</sub> [ <i>I</i> > 2σ( <i>I</i> )] | 0.2801                                                                           |
| <i>R</i> <sub>1</sub> (all data)                    | 0.1594                                                                           |
| <i>wR</i> <sub>2</sub> (all data)                   | 0.3324                                                                           |
| G.O.F.                                              | 1.067                                                                            |
| CCDC                                                | 2263765                                                                          |

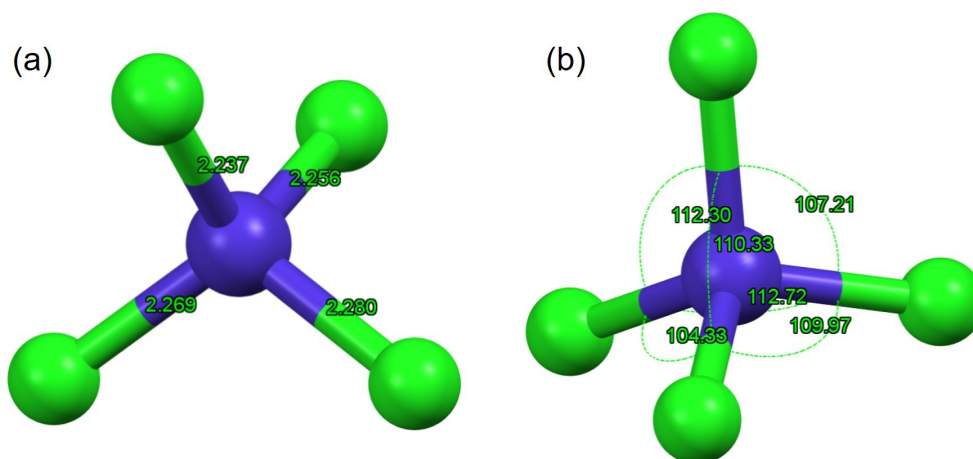

**Figure S1** (a) The Co-Cl bond lengths and (b) the Cl-Co-Cl angles.

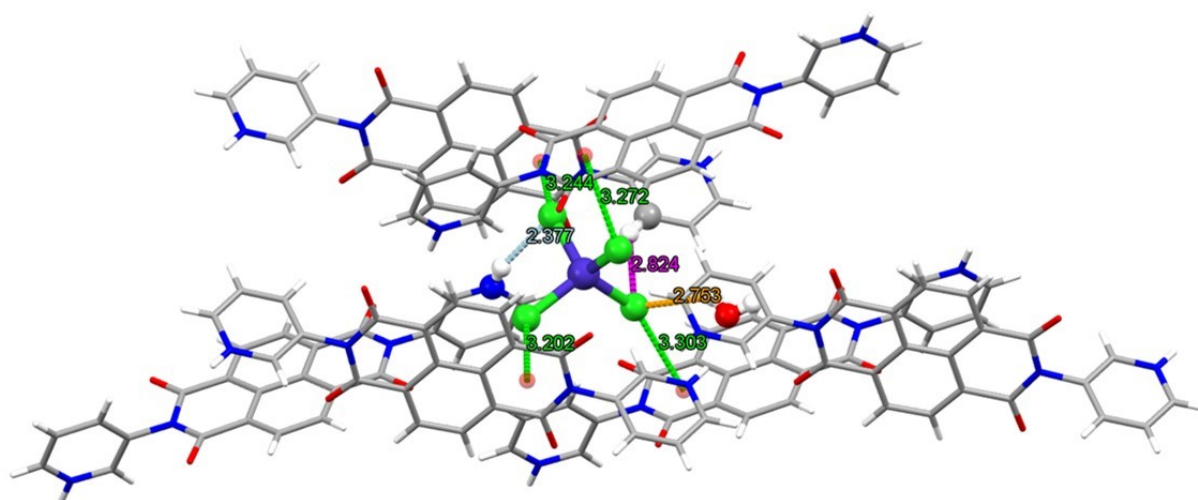

**Figure S2** (a) Intermolecular interactions around  $[\text{CoCl}_4]^{2-}$ . Green dashed lines represent Cl $\cdots\pi$ , pink dashed lines represent C-H $\cdots$ Cl, light blue dashed lines represent N-H $\cdots$ Cl, and yellow dashed lines represent O-H $\cdots$ Cl.

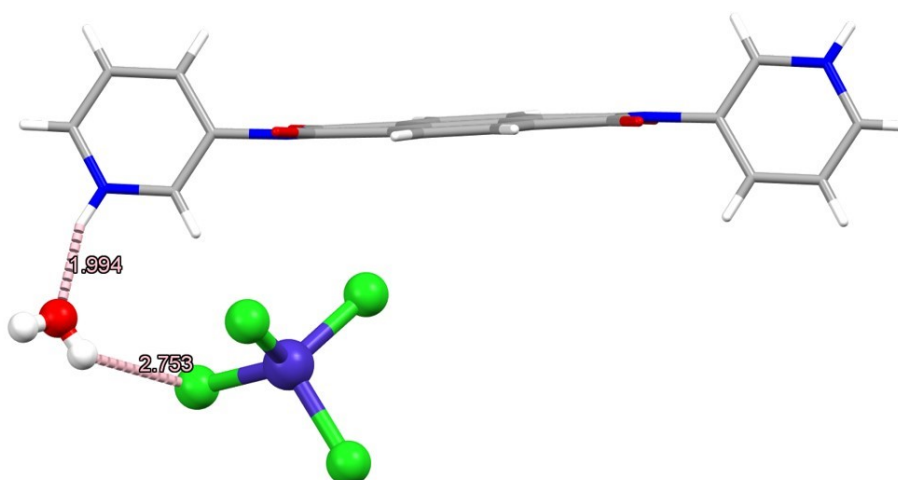

**Figure S3** Intermolecular interactions around a water molecule.

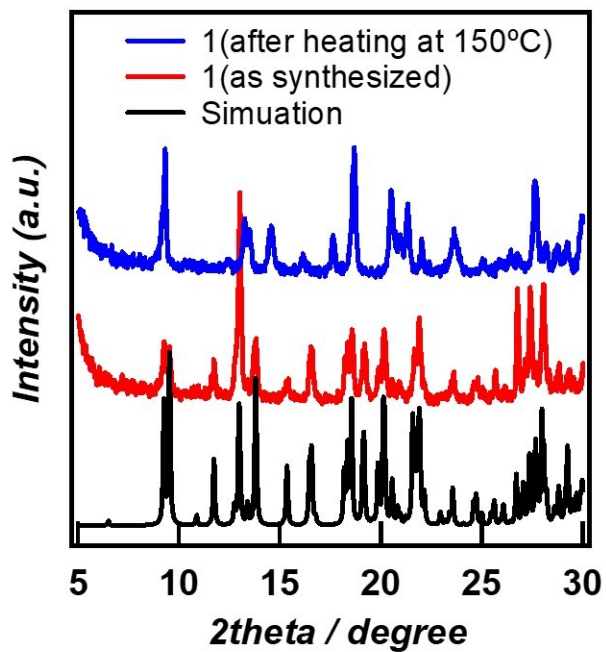

**Figure S4** PXRD pattern for the simulation (black) and before (red) and after (blue) removal of water molecules.

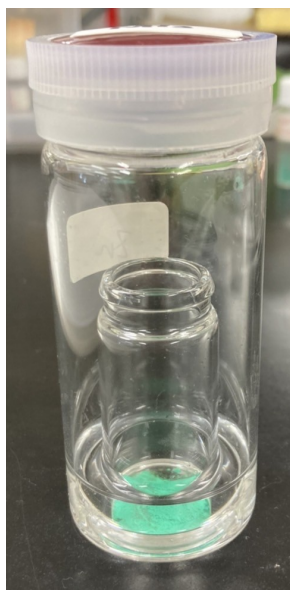

**Figure S5** A small vial (10 mL) containing approximately 20 mg of powder **1** was placed into a larger vial (50 mL) containing 5 mL of either ammonia or amine solution.

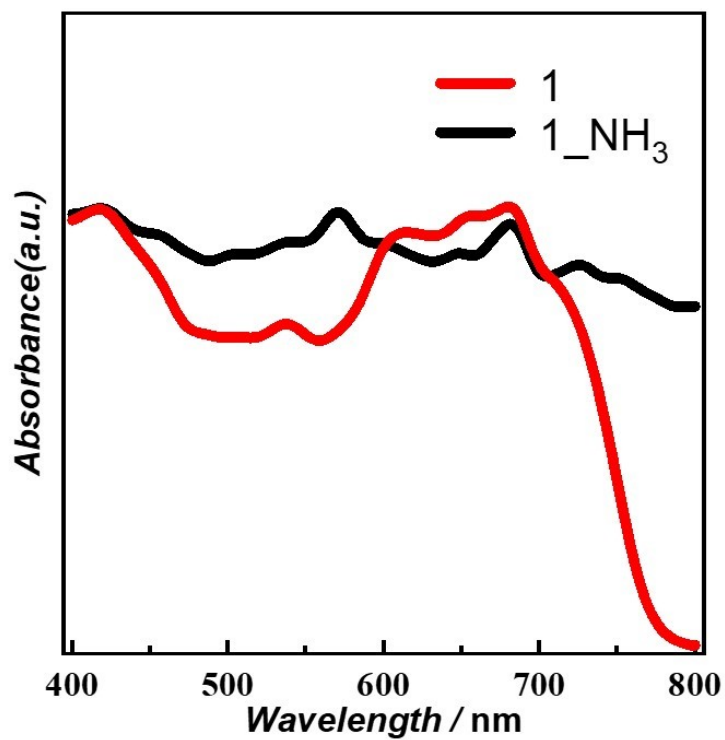

**Figure S6** Solid-state UV-vis spectra of compounds **1** and **1\_NH<sub>3</sub>**.

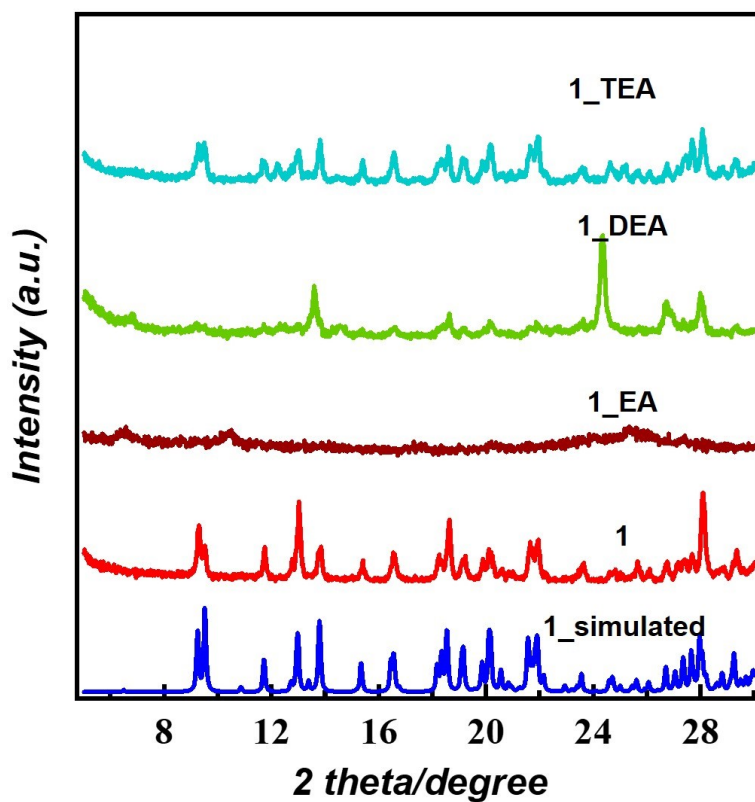

**Figure S7** PXRD patterns for the samples before and after exposure to ammonia and amines.

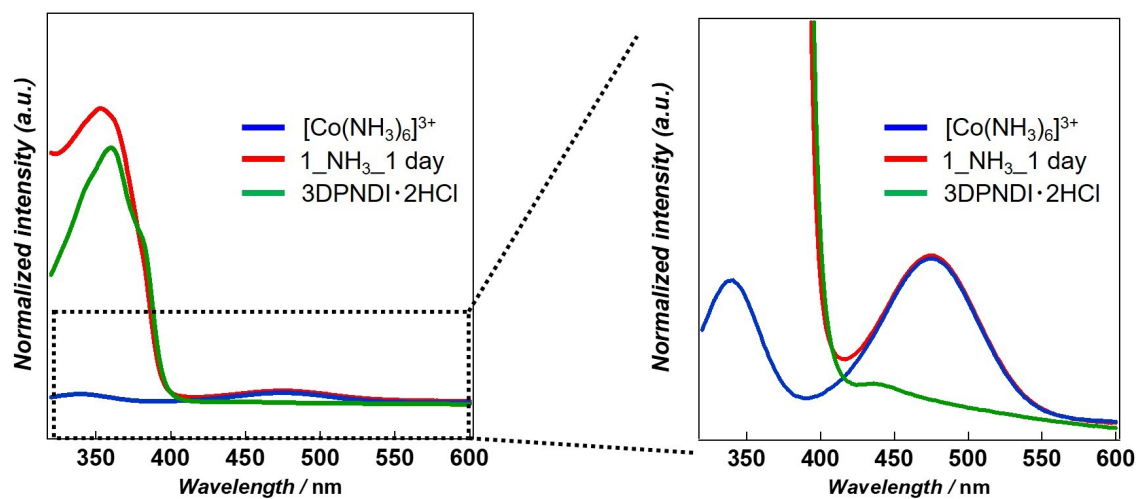

**Figure S8** UV-vis spectra and their enlarged versions (on the right) of  $[\text{Co}(\text{NH}_3)_6]^{3+}$  (blue),  $3\text{DPNDI} \cdot 2\text{HCl}$  (green), and  $1_{\text{NH}_3\_1 \text{ day}}$  (red).
